# Supplementary material for: Relative Roles of Race Versus Socioeconomic Position in Studies of Health Inequalities: A Matter of Interpretation
Source: PubMed Central journal article supplement (PMC10042447; doi:10.1146/annurev-publhealth-040617-014230), 2018-01-12
Supplement: NIHMS1876758-supplement-supplemental.pdf [file NIHMS1876758-supplement-supplemental.pdf]

**Supplemental Figure 1.** *American Journal of Epidemiology* citations by discipline. From *American Journal of Epidemiology* © 2008; 161(5):494-500. Oakes JM. An analysis of *American Journal of Epidemiology* citations with special reference to statistics and social science. Published by Oxford University Press. Printed with permission. All rights reserved.

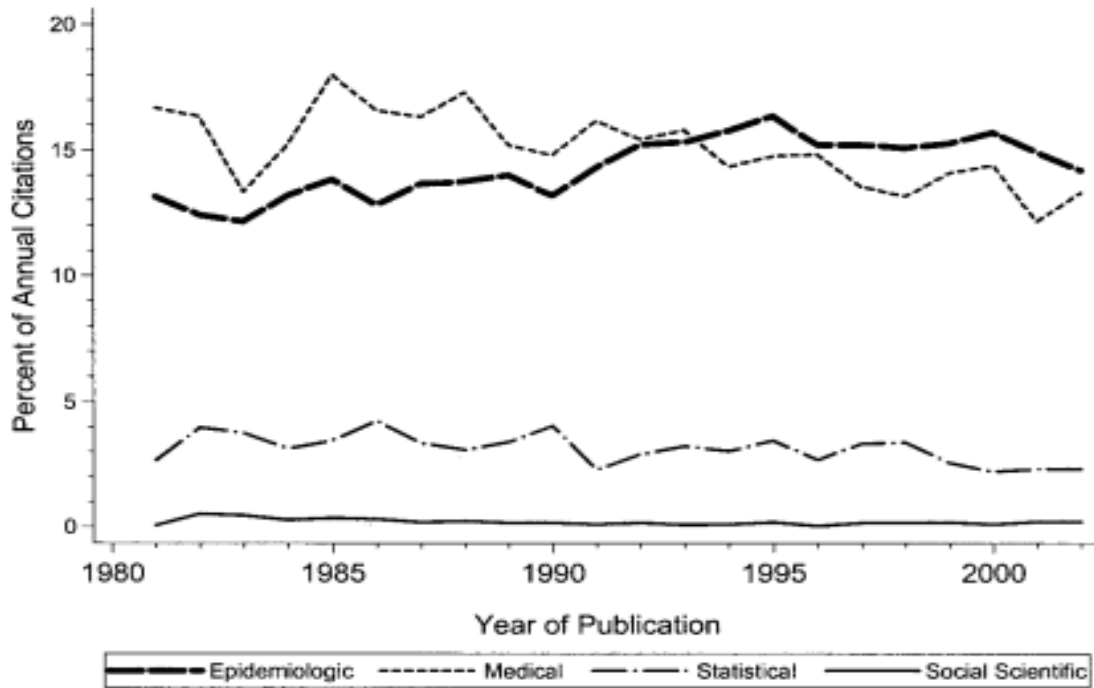

**Supplemental Figure 2** Socioeconomic position over the life course. From *British Medical Bulletin* © 2007 (1). Galobardes B, Lynch J, Smith GD. Measuring socioeconomic position in health research. Published by Oxford University Press. Printed with permission. All rights reserved.

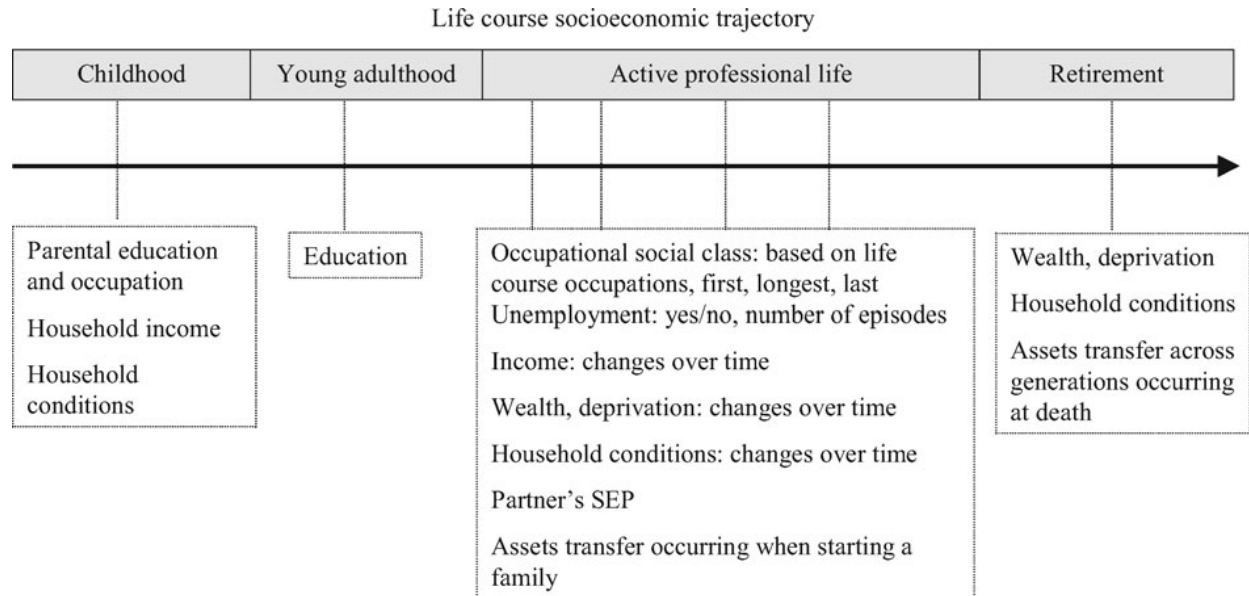

**Supplemental Figure 3** Direct and indirect pathway between race and disease. From *American Journal of Epidemiology* © 2001;154(4):291-8. Kaufman JS, Cooper RS. Commentary: considerations for use of racial/ethnic classification in etiologic research. Published by Oxford University Press. Printed with permission. All rights reserved.

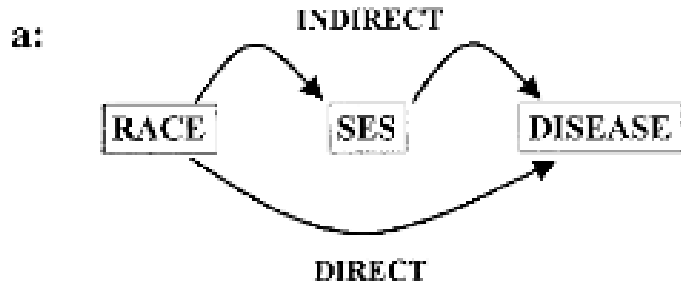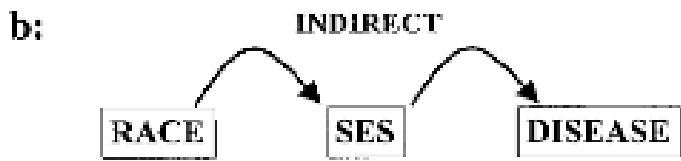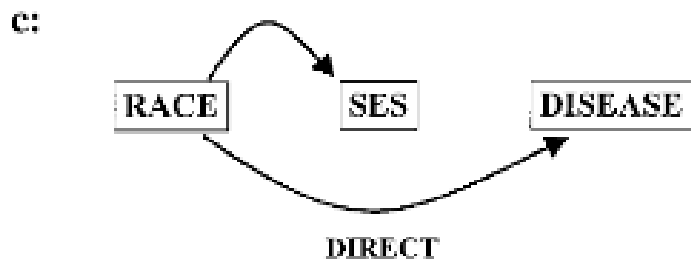

**Supplemental Figure 4** Model of racism as a fundamental cause. Reproduced with permission of *Annual Review of Sociology*, Volume 41:311-30 in 2015 © by Annual Reviews, <http://www.annualreviews.org>

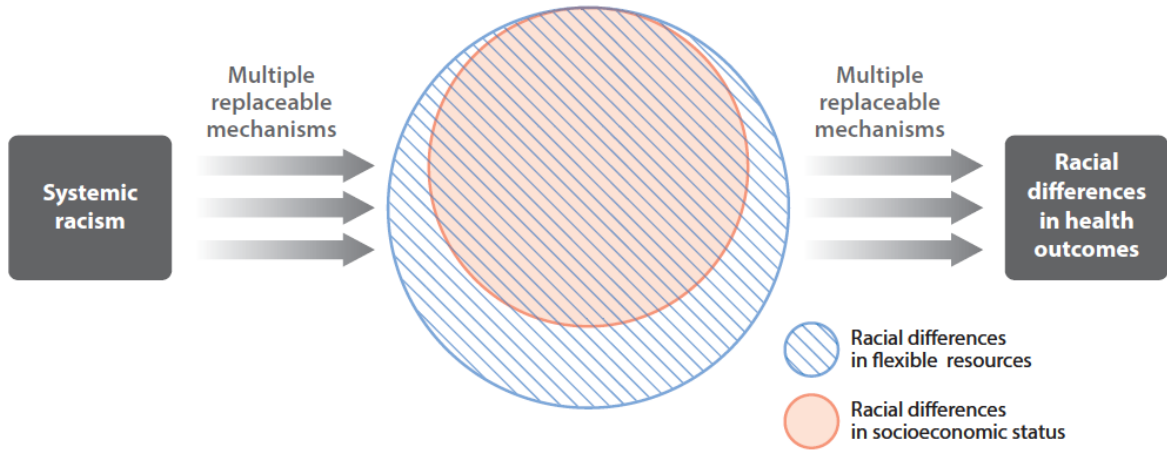

**Supplemental Figure 5** General health status, by self-identified and socially assigned “race.” From *Ethnicity & Disease* © 2008. Jones, Camara Phyllis et al. Published by ISHIB. Printed with permission. All rights reserved.

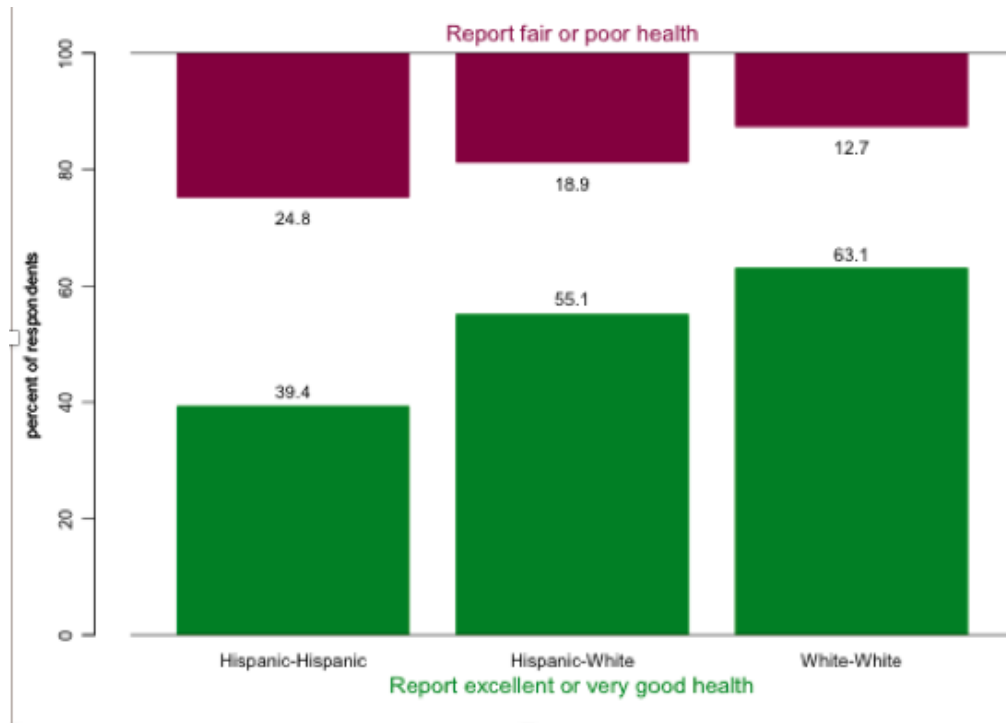

**Supplemental Figure 6** Percent of population whose general health status is excellent or very good by self-identified race/ethnicity and socially assigned race. From *Ethnicity & Disease* © 2008. Jones, Camara Phyllis et al. Published by ISHIB. Printed with permission. All rights reserved.

| Self-identified "race"/ethnicity | Socially assigned race |           |           |           |           |       |           | Row marginals |
|----------------------------------|------------------------|-----------|-----------|-----------|-----------|-------|-----------|---------------|
|                                  | White                  | Black     | Hispanic  | Am Indian | Asian     | NHOPI | Other     |               |
| White                            |                        |           |           |           |           |       |           |               |
| % excellent or very good         | 58.6                   |           | 50.3      |           |           |       | 49.2      | 58.4          |
| 95% confidence interval          | 57.8–59.5              |           | 36.1–64.4 |           |           |       | 34.6–63.9 | 57.6–59.3     |
| Black                            |                        |           |           |           |           |       |           |               |
| % excellent or very good         |                        | 44.3      |           |           |           |       |           | 44.0          |
| 95% confidence interval          |                        | 42.3–46.2 |           |           |           |       |           | 42.1–45.9     |
| Hispanic                         |                        |           |           |           |           |       |           |               |
| % excellent or very good         | 53.7                   | 44.4      | 39.8      |           |           |       |           | 43.7          |
| 95% confidence interval          | 46.2–60.9              | 28.9–61.2 | 35.3–44.6 |           |           |       |           | 40.0–47.4     |
| American Indian                  |                        |           |           |           |           |       |           |               |
| % excellent or very good         | 52.6                   |           |           | 32.0      |           |       |           | 42.4          |
| 95% confidence interval          | 41.3–63.8              |           |           | 21.8–44.3 |           |       |           | 34.7–50.5     |
| Asian                            |                        |           |           |           |           |       |           |               |
| % excellent or very good         |                        |           |           |           | 60.6      |       |           | 62.6          |
| 95% confidence interval          |                        |           |           |           | 49.7–70.5 |       |           | 53.2–71.1     |
| NHOPI                            |                        |           |           |           |           |       |           |               |
| % excellent or very good         |                        |           |           |           |           |       |           |               |
| 95% confidence interval          |                        |           |           |           |           |       |           |               |
| Other                            |                        |           |           |           |           |       |           |               |
| % excellent or very good         | 50.4                   |           |           |           |           |       |           | 45.6          |
| 95% confidence interval          | 35.8–64.9              |           |           |           |           |       |           | 36.1–55.5     |
| More than one race               |                        |           |           |           |           |       |           |               |
| % excellent or very good         | 53.5                   | 30.7      |           |           |           |       |           | 45.7          |
| 95% confidence interval          | 44.3–62.5              | 19.7–44.4 |           |           |           |       |           | 38.6–53.0     |

**Supplemental Figure 7** Physiognomy model. From *Health Services Research* © 1994;29(1):1. LaVeist TA. Beyond dummy variables and sample selection: what health services researchers ought to know about race as a variable. Published by John Wiley and Sons. All rights reserved.

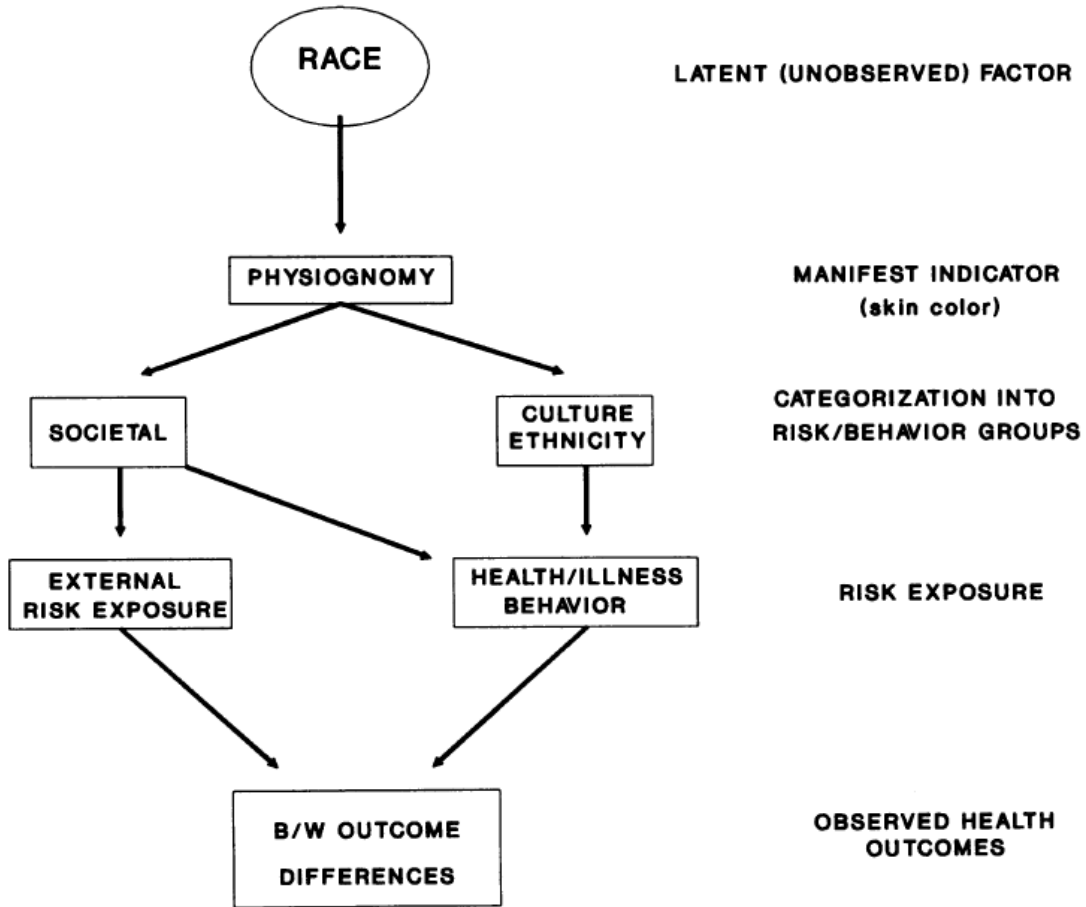

**Supplemental Table 1** Nested multivariate regression of psychological distress on race for full sample ( $n = 3587$ ). From *Stress and Health* © 2008. Nuru-Jeter, Amani et al. Published by John Wiley and Sons. Printed with permission. All rights reserved.

|                         | Model 1: race |      | Model 2: income |      | Model 3: gender |      | Model 4: race × income <sup>†</sup> |      | Model 5: education and health problems |      | Model 6: marital status and age |      |
|-------------------------|---------------|------|-----------------|------|-----------------|------|-------------------------------------|------|----------------------------------------|------|---------------------------------|------|
|                         | β             | SE   | β               | SE   | β               | SE   | β                                   | SE   | β                                      | SE   | β                               | ED   |
| Black                   | 0.32*         | 0.19 | 0.06            | 0.19 | 0.04            | 0.19 | 0.80*                               | 0.44 | 0.71                                   | 0.44 | 0.52                            | 0.43 |
| Hispanic                | 0.58***       | 0.19 | 0.32            | 0.19 | 0.31            | 0.19 | 0.64                                | 0.47 | 0.92**                                 | 0.46 | 0.55                            | 0.46 |
| API                     | 0.24          | 0.22 | 0.12            | 0.22 | 0.09            | 0.22 | -0.53                               | 0.55 | -0.05                                  | 0.54 | -0.14                           | 0.54 |
| Income                  | —             | —    | -0.44****       | 0.04 | -0.41****       | 0.04 | -0.36****                           | 0.07 | -0.23****                              | 0.07 | -0.17***                        | 0.07 |
| Household size          | —             | —    | 0.13**          | 0.05 | 0.13***         | 0.05 | 0.13***                             | 0.05 | 0.15***                                | 0.05 | 0.12**                          | 0.06 |
| Gender                  | —             | —    | —               | —    | 0.84****        | 0.14 | 0.83****                            | 0.14 | 0.79****                               | 0.14 | 0.78****                        | 0.14 |
| Black × Income          | —             | —    | —               | —    | —               | —    | -0.19**                             | 0.10 | -0.16                                  | 0.10 | -0.16*                          | 0.10 |
| Hispanic × Income       | —             | —    | —               | —    | —               | —    | -0.08                               | 0.10 | -0.12                                  | 0.10 | -0.11                           | 0.10 |
| API × Income            | —             | —    | —               | —    | —               | —    | 0.14                                | 0.11 | 0.08                                   | 0.11 | 0.05                            | 0.11 |
| Education               | —             | —    | —               | —    | —               | —    | —                                   | —    | -0.18***                               | 0.06 | -0.24****                       | 0.06 |
| Health problems         | —             | —    | —               | —    | —               | —    | —                                   | —    | 2.20****                               | 0.21 | 2.38****                        | 0.21 |
| Marital status          | —             | —    | —               | —    | —               | —    | —                                   | —    | —                                      | —    | 0.71****                        | 0.16 |
| Age                     | —             | —    | —               | —    | —               | —    | —                                   | —    | —                                      | —    | -0.03****                       | 0.00 |
| Adjusted R <sup>2</sup> |               |      |                 |      |                 |      |                                     |      |                                        |      |                                 | 0.10 |

\* $p < 0.10$ ; \*\* $p < 0.05$ ; \*\*\* $p < 0.01$ ; \*\*\*\* $p < 0.001$ .

Black (1 = yes, 2 = no); Hispanic (1 = yes, 2 = no); API (1 = yes, 2 = no); gender (1 = women, 2 = men); health problems (1 = yes, 0 = no); marital status (1 = not married, 0 = married).

API: Asian/Pacific Islander; SE: standard error.

<sup>†</sup>[Correction made here after initial online publication]
